# Supplementary material
Source: PubMed Central journal article supplement (PMC6256265)
Supplement: aps2017110x1.pdf [file aps2017110x1.pdf]

## **Supplementary file S1:**

### **Section 1. Defining network topological feature set**

For each node  $i$  in interaction network, we defined four measures for assessing its topological property: (1) 'Degree' is defined as the number of links to node  $i$ ; (2) 'Node betweenness' is defined as the number of shortest paths between pairs of nodes that run through node  $i$ . (3) 'Closeness' is defined as the inverse of the farness which is the sum of node  $i$  distances to all other nodes. The Closeness centrality can be regarded as a measure of how long it will take to spread information from node  $i$  to all other nodes sequentially. Degree, node betweenness and closeness centralities can measure a node's topological importance in the network. The larger a node's degree/ node betweenness /closeness centrality is, the more important the node is in the interaction network [15]. (4) K-core analysis is an iterative process in which the nodes are removed from the networks in order of least-connected [16]. The core of maximum order is defined as the main core or the highest k-core of the network. A k-core sub-network of the original network can be generated by recursively deleting vertices from the network whose degree is less than  $k$ . This results in a series of sub-networks that gradually reveal the globally central region of the original network. On this basis, 'K value' is used to measure the centrality of node  $i$ .

### **References:**

- [1]. Wang Y, Liu Z, Li C, Li D, Ouyang Y, Yu J, Guo S, He F, Wang W. Drug target prediction based on the herbs components: the study on the multitargets pharmacological mechanism of qishenkeli acting on the coronary heart disease. Evid Based Complement

Alternat Med. 2012;2012:698531.

- [2]. Wuchty S, Almaas E. Evolutionary cores of domain co-occurrence networks. *BMC Evol Biol.* 2005; 5:24.
- [3]. Qi Y, Li S, Pi Z, Song F, Lin N, Liu S, Liu Z. Chemical profiling of Wu-tou decoction by UPLC-Q-TOF-MS. *Talanta.* 2014;118:21-9.
- [4]. Brenner M, Meng HC, Yarlett NC, Griffiths MM, Remmers EF, Wilder RL, Gulko PS. The non-MHC quantitative trait locus Cia10 contains a major arthritis gene and regulates disease severity, pannus formation and joint damage. *Arthritis Rheum.* 2005; 52(1):322-32.
- [5]. Cai X, Zhou H, Wong YF, Xie Y, Liu ZQ, Jiang ZH, Bian ZX, Xu HX, Liu L. Suppression of the onset and progression of collagen-induced arthritis in rats by QFGJS, a preparation from an anti-arthritic Chinese herbal formula. *J Ethnopharmacol.* 2007;110(1):39-48.
- [6]. Esser RE, Hildebrand AR, Angelo RA, Watts LM, Murphey MD, Baugh LE. Measurement of radiographic changes in adjuvant-induced arthritis in rats by quantitative image analysis. *Arthritis Rheum.* 1995; 38(1):129-38.

**Table S1 List of neuropathic pain-related genes collected from Drugbank and OMIM database**

| <b>Gene symbol</b> | <b>Database</b> |
|--------------------|-----------------|
| A2M                | DrugBank        |
| ABAT               | DrugBank        |
| ABCC1              | DrugBank        |
| ABCC2              | DrugBank        |
| ABL1               | DrugBank        |
| ACHE               | DrugBank        |
| ADH1A              | DrugBank        |
| ADH1B              | DrugBank        |
| ADH1C              | DrugBank        |
| ADORA1             | DrugBank        |
| ADORA2A            | DrugBank        |
| ADRA1A             | DrugBank        |
| ADRA1B             | DrugBank        |
| ADRA1D             | DrugBank        |
| ADRA2A             | DrugBank        |
| ADRA2B             | DrugBank        |
| ADRA2C             | DrugBank        |
| ADRB1              | DrugBank        |
| ADRB2              | DrugBank        |
| ADRB3              | DrugBank        |
| AHR                | DrugBank        |
| AKR1C1             | DrugBank        |
| ALOX5              | DrugBank        |
| ANPEP              | DrugBank        |
| AOC3               | DrugBank        |
| AR                 | DrugBank        |
| ASIC1              | DrugBank        |
| ASIC3              | DrugBank        |
| ATP4A              | DrugBank        |
| ATP6V1A            | DrugBank        |
| AVPR1A             | DrugBank        |
| AVPR1B             | DrugBank        |
| AVPR2              | DrugBank        |
| B4GALT1            | DrugBank        |
| B4GALT2            | DrugBank        |
| B4GALT3            | DrugBank        |
| B4GALT4            | DrugBank        |
| BCAT1              | DrugBank        |
| BCHE               | DrugBank        |
| BCL2               | DrugBank        |
| BCR/ABLFUSIO       | DrugBank        |
| BDKRB2             | DrugBank        |
| BLAZ               | DrugBank        |
| BRAF               | DrugBank        |
| C1QBP              | DrugBank        |
| C5                 | DrugBank        |
| CA1                | DrugBank        |
| CACNA1A            | DrugBank        |
| CACNA1B            | DrugBank        |

|          |          |
|----------|----------|
| CACNA1C  | DrugBank |
| CACNA2D1 | DrugBank |
| CACNA2D2 | DrugBank |
| CALCA    | DrugBank |
| CALCB    | DrugBank |
| CALCR    | DrugBank |
| CAMC     | DrugBank |
| CARTPT   | DrugBank |
| CCL2     | DrugBank |
| CCL3     | DrugBank |
| CD44     | DrugBank |
| CFTR     | DrugBank |
| CHRM1    | DrugBank |
| CHRM2    | DrugBank |
| CHRM3    | DrugBank |
| CHRM4    | DrugBank |
| CHRM5    | DrugBank |
| CHRNA1   | DrugBank |
| CHRNA10  | DrugBank |
| CHRNA2   | DrugBank |
| CHRNA3   | DrugBank |
| CHRNA4   | DrugBank |
| CHRNA7   | DrugBank |
| CHRNA9   | DrugBank |
| CHRNB2   | DrugBank |
| CHRNB4   | DrugBank |
| CLCN2    | DrugBank |
| CLCNKA   | DrugBank |
| CNR1     | DrugBank |
| CNR2     | DrugBank |
| COBT     | DrugBank |
| COMT     | DrugBank |
| CRBN     | DrugBank |
| CSF1R    | DrugBank |
| CTLA4    | DrugBank |
| CXCR1    | DrugBank |
| CYP11B1  | DrugBank |
| CYP17A1  | DrugBank |
| CYP1A2   | DrugBank |
| CYP27B1  | DrugBank |
| CYSLTR1  | DrugBank |
| DACA     | DrugBank |
| DACB     | DrugBank |
| DACC     | DrugBank |
| DDR1     | DrugBank |
| DDR2     | DrugBank |
| DPP4     | DrugBank |
| DRD1     | DrugBank |
| DRD2     | DrugBank |
| DRD3     | DrugBank |
| DRD4     | DrugBank |

|        |          |
|--------|----------|
| DRD5   | DrugBank |
| E      | DrugBank |
| EDNRA  | DrugBank |
| EGFR   | DrugBank |
| ELN    | DrugBank |
| EPHA2  | DrugBank |
| ESR1   | DrugBank |
| ESR2   | DrugBank |
| ESRRG  | DrugBank |
| FAAH   | DrugBank |
| FABP2  | DrugBank |
| FCGR1A | DrugBank |
| FDPS   | DrugBank |
| FGA    | DrugBank |
| FGF1   | DrugBank |
| FGF2   | DrugBank |
| FGF4   | DrugBank |
| FGFR1  | DrugBank |
| FGFR2  | DrugBank |
| FLT1   | DrugBank |
| FLT4   | DrugBank |
| FN1    | DrugBank |
| FPGS   | DrugBank |
| FRK    | DrugBank |
| FTSI   | DrugBank |
| GABBR1 | DrugBank |
| GABBR2 | DrugBank |
| GABRA1 | DrugBank |
| GABRA2 | DrugBank |
| GABRA3 | DrugBank |
| GABRA4 | DrugBank |
| GABRA5 | DrugBank |
| GABRA6 | DrugBank |
| GABRB1 | DrugBank |
| GABRB2 | DrugBank |
| GABRB3 | DrugBank |
| GABRD  | DrugBank |
| GABRE  | DrugBank |
| GABRG1 | DrugBank |
| GABRG3 | DrugBank |
| GABRP  | DrugBank |
| GABRQ  | DrugBank |
| GABRR1 | DrugBank |
| GABRR2 | DrugBank |
| GABRR3 | DrugBank |
| GAD65  | DrugBank |
| GDNF   | DrugBank |
| GGPS1  | DrugBank |
| GLO1   | DrugBank |
| GLP2R  | DrugBank |
| GLRA1  | DrugBank |

|          |          |
|----------|----------|
| GLRA2    | DrugBank |
| GLRA3    | DrugBank |
| GNRHR    | DrugBank |
| GNRHR2   | DrugBank |
| GPT      | DrugBank |
| GPT2     | DrugBank |
| GRIA2    | DrugBank |
| GRIK2    | DrugBank |
| GRIN1    | DrugBank |
| GRIN2A   | DrugBank |
| GRIN2B   | DrugBank |
| GRIN2C   | DrugBank |
| GRIN2D   | DrugBank |
| GRIN3A   | DrugBank |
| GRIN3B   | DrugBank |
| GSTP1    | DrugBank |
| GUCY2C   | DrugBank |
| HABP2    | DrugBank |
| HABP4    | DrugBank |
| HAPLN1   | DrugBank |
| HAPLN3   | DrugBank |
| HAPLN4   | DrugBank |
| HDAC2    | DrugBank |
| HLA-DRB1 | DrugBank |
| HMGCR    | DrugBank |
| HMMR     | DrugBank |
| HRH1     | DrugBank |
| HRH2     | DrugBank |
| HRH3     | DrugBank |
| HRH4     | DrugBank |
| HSPA5    | DrugBank |
| HTR1A    | DrugBank |
| HTR1B    | DrugBank |
| HTR1D    | DrugBank |
| HTR1E    | DrugBank |
| HTR1F    | DrugBank |
| HTR2A    | DrugBank |
| HTR2B    | DrugBank |
| HTR2C    | DrugBank |
| HTR3A    | DrugBank |
| HTR6     | DrugBank |
| HTR7     | DrugBank |
| ICAM1    | DrugBank |
| IFNG     | DrugBank |
| IKBKB    | DrugBank |
| IL10     | DrugBank |
| IL1B     | DrugBank |
| IL1R1    | DrugBank |
| IL5      | DrugBank |
| IL6      | DrugBank |
| IMPDH1   | DrugBank |

|        |          |
|--------|----------|
| IMPDH2 | DrugBank |
| IMPG2  | DrugBank |
| JAK1   | DrugBank |
| JAK2   | DrugBank |
| JAK3   | DrugBank |
| KCNA1  | DrugBank |
| KCND2  | DrugBank |
| KCND3  | DrugBank |
| KCNH2  | DrugBank |
| KCNJ1  | DrugBank |
| KCNJ11 | DrugBank |
| KCNJ8  | DrugBank |
| KCNMA1 | DrugBank |
| KCNQ1  | DrugBank |
| KCNQ2  | DrugBank |
| KCNQ3  | DrugBank |
| KCNQ4  | DrugBank |
| KCNQ5  | DrugBank |
| KDR    | DrugBank |
| KEAP1  | DrugBank |
| KIT    | DrugBank |
| LAYN   | DrugBank |
| LHCGR  | DrugBank |
| LTF    | DrugBank |
| MAOA   | DrugBank |
| MAOB   | DrugBank |
| MAPK11 | DrugBank |
| MAPK14 | DrugBank |
| MPL    | DrugBank |
| MRCA   | DrugBank |
| MRCB   | DrugBank |
| MRDA   | DrugBank |
| MT-CO2 | DrugBank |
| MT-ND5 | DrugBank |
| MUC2   | DrugBank |
| N/A    | DrugBank |
| NAGK   | DrugBank |
| NAGLU  | DrugBank |
| NAGPA  | DrugBank |
| NCAN   | DrugBank |
| NFKB1  | DrugBank |
| NFKB2  | DrugBank |
| NFKBIA | DrugBank |
| NGF    | DrugBank |
| NISCH  | DrugBank |
| NOS1   | DrugBank |
| NOS2   | DrugBank |
| NPRS   | DrugBank |
| NPY2R  | DrugBank |
| NR3C1  | DrugBank |
| NTF3   | DrugBank |

|         |          |
|---------|----------|
| NTF4    | DrugBank |
| NTRK1   | DrugBank |
| NTRK2   | DrugBank |
| OPRD1   | DrugBank |
| OPRK1   | DrugBank |
| OPRL1   | DrugBank |
| OPRM1   | DrugBank |
| ORM1    | DrugBank |
| ORM2    | DrugBank |
| PAGA    | DrugBank |
| PBP1B   | DrugBank |
| PBP2A   | DrugBank |
| PBP3    | DrugBank |
| PBPA    | DrugBank |
| PCCB    | DrugBank |
| PDE3A   | DrugBank |
| PDE4A   | DrugBank |
| PDE5A   | DrugBank |
| PDE6G   | DrugBank |
| PDE6H   | DrugBank |
| PDGFRA  | DrugBank |
| PDGFRB  | DrugBank |
| PDPK1   | DrugBank |
| PENA    | DrugBank |
| PGF     | DrugBank |
| PGR     | DrugBank |
| PGRMC1  | DrugBank |
| PKN3    | DrugBank |
| PLA2G1B | DrugBank |
| PLA2G2A | DrugBank |
| PLA2G2E | DrugBank |
| PLA2G4A | DrugBank |
| PLAT    | DrugBank |
| POL     | DrugBank |
| POLB    | DrugBank |
| POMC    | DrugBank |
| PONB    | DrugBank |
| POR     | DrugBank |
| PPARA   | DrugBank |
| PPARG   | DrugBank |
| PRKAA1  | DrugBank |
| PRKAA2  | DrugBank |
| PRKAB1  | DrugBank |
| PRKAB2  | DrugBank |
| PRKAG2  | DrugBank |
| PRKAG3  | DrugBank |
| PTGDR2  | DrugBank |
| PTGER1  | DrugBank |
| PTGIS   | DrugBank |
| PTGR2   | DrugBank |
| PTGS1   | DrugBank |



|          |          |
|----------|----------|
| PTGS2    | DrugBank |
| PTH1R    | DrugBank |
| PTPRS    | DrugBank |
| RAF1     | DrugBank |
| RENBP    | DrugBank |
| RET      | DrugBank |
| RHOB     | DrugBank |
| RNASE3   | DrugBank |
| RPS6KA3  | DrugBank |
| RXRA     | DrugBank |
| SCN10A   | DrugBank |
| SCN1A    | DrugBank |
| SCN2A    | DrugBank |
| SCN3A    | DrugBank |
| SCN4A    | DrugBank |
| SCN5A    | DrugBank |
| SCN8A    | DrugBank |
| SCN9A    | DrugBank |
| SERPINF2 | DrugBank |
| SI       | DrugBank |
| SIGMAR1  | DrugBank |
| SLC18A2  | DrugBank |
| SLC25A4  | DrugBank |
| SLC25A5  | DrugBank |
| SLC25A6  | DrugBank |
| SLC6A2   | DrugBank |
| SLC6A3   | DrugBank |
| SLC6A4   | DrugBank |
| SMPD1    | DrugBank |
| SNAP25   | DrugBank |
| SNF      | DrugBank |
| SST      | DrugBank |
| SSTR1    | DrugBank |
| SSTR2    | DrugBank |
| SSTR3    | DrugBank |
| SSTR5    | DrugBank |
| STAB2    | DrugBank |
| SYT2     | DrugBank |
| TAAR1    | DrugBank |
| TACR1    | DrugBank |
| TACR3    | DrugBank |
| TEK      | DrugBank |
| THBD     | DrugBank |
| TK       | DrugBank |
| TLR2     | DrugBank |
| TLR4     | DrugBank |
| TLR7     | DrugBank |
| TLR8     | DrugBank |
| TLR9     | DrugBank |
| TNF      | DrugBank |
| TNFAIP6  | DrugBank |

|          |          |
|----------|----------|
| TNFSF11  | DrugBank |
| TNFSF13B | DrugBank |
| TNNC1    | DrugBank |
| TP53     | DrugBank |
| TPMT     | DrugBank |
| TPO      | DrugBank |
| TRDMT1   | DrugBank |
| TRIM13   | DrugBank |
| TRPA1    | DrugBank |
| TRPM8    | DrugBank |
| TRPS     | DrugBank |
| TRPV3    | DrugBank |
| TSPO     | DrugBank |
| TUBB     | DrugBank |
| TUBB1    | DrugBank |
| TYMS     | DrugBank |
| UGT1A9   | DrugBank |
| UL30     | DrugBank |
| VAMP1    | DrugBank |
| VAMP2    | DrugBank |
| VAR5     | DrugBank |
| VCAN     | DrugBank |
| VDAC1    | DrugBank |
| VDAC2    | DrugBank |
| VDAC3    | DrugBank |
| VDR      | DrugBank |
| VEGFA    | DrugBank |
| VEGFB    | DrugBank |
| WARS     | DrugBank |
| WARS2    | DrugBank |
| AAS      | OMIM     |
| ABCG5    | OMIM     |
| ACADVLD  | OMIM     |
| ACCN1    | OMIM     |
| ACCN2    | OMIM     |
| ACCN3    | OMIM     |
| ACTC1    | OMIM     |
| ACTG2    | OMIM     |
| ADCAD1   | OMIM     |
| ADCY1    | OMIM     |
| ADCY8    | OMIM     |
| ADHR     | OMIM     |
| ADM      | OMIM     |
| ADORA2A  | OMIM     |
| AGER     | OMIM     |
| AGS5     | OMIM     |
| AKT1     | OMIM     |
| AKU      | OMIM     |
| ALAD     | OMIM     |
| ALDD     | OMIM     |
| ALDOB    | OMIM     |

|          |      |
|----------|------|
| ALMS     | OMIM |
| ALPL     | OMIM |
| ALS21    | OMIM |
| AN       | OMIM |
| ANKH     | OMIM |
| APOA5    | OMIM |
| APOC2    | OMIM |
| APOE     | OMIM |
| AR       | OMIM |
| ARH      | OMIM |
| ARHR1    | OMIM |
| ARRB2    | OMIM |
| ARSA     | OMIM |
| ARTN     | OMIM |
| ARVD5    | OMIM |
| ATL1     | OMIM |
| ATP2A1   | OMIM |
| ATS      | OMIM |
| B2M      | OMIM |
| BCNS     | OMIM |
| BCPM     | OMIM |
| BDCHS    | OMIM |
| BDKRB1   | OMIM |
| BDKRB2   | OMIM |
| BDMR     | OMIM |
| BDNF     | OMIM |
| BMD      | OMIM |
| BOS      | OMIM |
| BRGDA5   | OMIM |
| BRRS     | OMIM |
| BTG2     | OMIM |
| BTK      | OMIM |
| BWS      | OMIM |
| CACNA1A  | OMIM |
| CACNA1B  | OMIM |
| CACNA1G  | OMIM |
| CACNA2D1 | OMIM |
| CACNA2D2 | OMIM |
| CACNA2D3 | OMIM |
| CACNA2D4 | OMIM |
| CACNB3   | OMIM |
| CACNG2   | OMIM |
| CACP     | OMIM |
| CALJA    | OMIM |
| CAMK4    | OMIM |
| CARASIL  | OMIM |
| CAV3     | OMIM |
| CBS      | OMIM |
| CCAL2    | OMIM |
| CCR2     | OMIM |
| CCR5     | OMIM |

|         |      |
|---------|------|
| CCT4    | OMIM |
| CD      | OMIM |
| CD209   | OMIM |
| CD40LG  | OMIM |
| CDB2    | OMIM |
| CDG10   | OMIM |
| CDK5    | OMIM |
| CDK5R1  | OMIM |
| CDSP    | OMIM |
| CECR1   | OMIM |
| CF      | OMIM |
| CFTD    | OMIM |
| CHRNA10 | OMIM |
| CHRNA9  | OMIM |
| CINCA   | OMIM |
| CIP     | OMIM |
| CIPA    | OMIM |
| CISS1   | OMIM |
| CISS2   | OMIM |
| CLCN1   | OMIM |
| CLCN6   | OMIM |
| CLCNKB  | OMIM |
| CMD1A   | OMIM |
| CMD1S   | OMIM |
| CMD1Y   | OMIM |
| CMD3B   | OMIM |
| CMH1    | OMIM |
| CMH18   | OMIM |
| CMH4    | OMIM |
| CMT1A   | OMIM |
| CMT1B   | OMIM |
| CMT2A2  | OMIM |
| CMT2B   | OMIM |
| CMT2F   | OMIM |
| CMT2O   | OMIM |
| CMT2P   | OMIM |
| CMT4B3  | OMIM |
| CMT4J   | OMIM |
| CMTRIA  | OMIM |
| CMTRIB  | OMIM |
| CNNM4   | OMIM |
| CNR1    | OMIM |
| CNR2    | OMIM |
| CNTN1   | OMIM |
| COL11A2 | OMIM |
| COL1A1  | OMIM |
| COL1A2  | OMIM |
| COL2A1  | OMIM |
| COL3A1  | OMIM |
| COL5A2  | OMIM |
| COL6A1  | OMIM |

|         |      |
|---------|------|
| COL9A2  | OMIM |
| COL9A3  | OMIM |
| COMP    | OMIM |
| COMT    | OMIM |
| COX20   | OMIM |
| COX6B1  | OMIM |
| CPS1    | OMIM |
| CPT2    | OMIM |
| CRLF1   | OMIM |
| CSF2    | OMIM |
| CSF2RA  | OMIM |
| CSF3    | OMIM |
| CSF3R   | OMIM |
| CSNK1D  | OMIM |
| CSS     | OMIM |
| CTS1    | OMIM |
| CTSC    | OMIM |
| CVS     | OMIM |
| CWS1    | OMIM |
| CYP19A1 | OMIM |
| CYP2D6  | OMIM |
| DAR     | OMIM |
| DDH1    | OMIM |
| DDH2    | OMIM |
| DIAR6   | OMIM |
| DIAR7   | OMIM |
| DJS     | OMIM |
| DLD     | OMIM |
| DLDD    | OMIM |
| DM1     | OMIM |
| DM2     | OMIM |
| DMD     | OMIM |
| DPYSL2  | OMIM |
| DRGX    | OMIM |
| DRP2    | OMIM |
| DSMA1   | OMIM |
| DUH3    | OMIM |
| DYNC1H1 | OMIM |
| DYT16   | OMIM |
| EA1     | OMIM |
| EDM2    | OMIM |
| EDM3    | OMIM |
| EDM5    | OMIM |
| EDM6    | OMIM |
| EDMD1   | OMIM |
| EDN1    | OMIM |
| EDNRB   | OMIM |
| EGR2    | OMIM |
| EIEE11  | OMIM |
| EIF2AK3 | OMIM |
| ELANE   | OMIM |

|        |      |
|--------|------|
| EMD    | OMIM |
| EOE1   | OMIM |
| ERBB4  | OMIM |
| ESCO2  | OMIM |
| ESTRR  | OMIM |
| F12    | OMIM |
| F2RL1  | OMIM |
| F7     | OMIM |
| FAAH   | OMIM |
| FASPS2 | OMIM |
| FBN1   | OMIM |
| FBN2   | OMIM |
| FCAS1  | OMIM |
| FCAS2  | OMIM |
| FEO    | OMIM |
| FEPS1  | OMIM |
| FEPS2  | OMIM |
| FEPS3  | OMIM |
| FGA    | OMIM |
| FHM1   | OMIM |
| FILS   | OMIM |
| FMF    | OMIM |
| FOP    | OMIM |
| FRTS2  | OMIM |
| FSHD2  | OMIM |
| FSHR   | OMIM |
| FTL    | OMIM |
| FXN    | OMIM |
| FXTAS  | OMIM |
| G6PD   | OMIM |
| GABBR1 | OMIM |
| GABRA2 | OMIM |
| GABRA3 | OMIM |
| GAD2   | OMIM |
| GAL    | OMIM |
| GALR2  | OMIM |
| GALR3  | OMIM |
| GBA    | OMIM |
| GBD1   | OMIM |
| GBS    | OMIM |
| GCH1   | OMIM |
| GDNF   | OMIM |
| GHDD   | OMIM |
| GHSR   | OMIM |
| GLA    | OMIM |
| GLB1   | OMIM |
| GLRA3  | OMIM |
| GNAI2  | OMIM |
| GNAO1  | OMIM |
| GNE    | OMIM |
| GNPTAB | OMIM |

|         |      |
|---------|------|
| GNPTAG  | OMIM |
| GNPTG   | OMIM |
| GPIHBP1 | OMIM |
| GPR74   | OMIM |
| GRP     | OMIM |
| GRPR    | OMIM |
| GSD     | OMIM |
| GSD10   | OMIM |
| GSD11   | OMIM |
| GSD2    | OMIM |
| GSD3    | OMIM |
| GSD5    | OMIM |
| GSD7    | OMIM |
| GSD9D   | OMIM |
| GSTA1   | OMIM |
| HADHA   | OMIM |
| HADHB   | OMIM |
| HAE1    | OMIM |
| HAE3    | OMIM |
| HBB     | OMIM |
| HBG2    | OMIM |
| HCN2    | OMIM |
| HCP     | OMIM |
| HEMA    | OMIM |
| HEXB    | OMIM |
| HFE1    | OMIM |
| HFE2A   | OMIM |
| HFE4    | OMIM |
| HFTC    | OMIM |
| HHT     | OMIM |
| HIDS    | OMIM |
| HJCYS   | OMIM |
| HLRCC   | OMIM |
| HMAG    | OMIM |
| HMBS    | OMIM |
| HMN2D   | OMIM |
| HMSNR   | OMIM |
| HNA     | OMIM |
| HNF1A   | OMIM |
| HOMER1  | OMIM |
| HOMG3   | OMIM |
| HPGD    | OMIM |
| HRPT2   | OMIM |
| HSA     | OMIM |
| HSAN1A  | OMIM |
| HSAN1C  | OMIM |
| HSAN2A  | OMIM |
| HSAN2B  | OMIM |
| HSAN3   | OMIM |
| HSAN5   | OMIM |
| HSAN6   | OMIM |

|         |      |
|---------|------|
| HSAN7   | OMIM |
| HSN1D   | OMIM |
| HSN1E   | OMIM |
| HSN1F   | OMIM |
| HSN2C   | OMIM |
| HTR1B   | OMIM |
| HTR1E   | OMIM |
| HTR2A   | OMIM |
| HTR3A   | OMIM |
| HYPP    | OMIM |
| IBD1    | OMIM |
| IBMPFD1 | OMIM |
| ICP3    | OMIM |
| IDD     | OMIM |
| IFNGR1  | OMIM |
| IL1B    | OMIM |
| IL33    | OMIM |
| JBS     | OMIM |
| JPS     | OMIM |
| KCNIP3  | OMIM |
| KCNJ1   | OMIM |
| KCNJ2   | OMIM |
| KIF1A   | OMIM |
| KIT     | OMIM |
| KNG1    | OMIM |
| KRAS    | OMIM |
| L1CAM   | OMIM |
| LAM     | OMIM |
| LBR     | OMIM |
| LDS2    | OMIM |
| LDS3    | OMIM |
| LEP     | OMIM |
| LGMD2H  | OMIM |
| LGMD2L  | OMIM |
| LGMD2S  | OMIM |
| LIFR    | OMIM |
| LPIN1   | OMIM |
| LPL     | OMIM |
| LRP1    | OMIM |
| LYZ     | OMIM |
| MADA    | OMIM |
| MADD    | OMIM |
| MAPT    | OMIM |
| MARS    | OMIM |
| MAS     | OMIM |
| MAS1L   | OMIM |
| MBS     | OMIM |
| MC1R    | OMIM |
| MCKD1   | OMIM |
| MCM6    | OMIM |
| MDDGC5  | OMIM |



|         |      |
|---------|------|
| MDDGC7  | OMIM |
| MECP2   | OMIM |
| MEFV    | OMIM |
| MEN1    | OMIM |
| MEN2A   | OMIM |
| MEN2B   | OMIM |
| MFM1    | OMIM |
| MFM5    | OMIM |
| MFN2    | OMIM |
| MFS     | OMIM |
| MGR13   | OMIM |
| MGS     | OMIM |
| MJD     | OMIM |
| MLYCD   | OMIM |
| MMDD    | OMIM |
| MMP2    | OMIM |
| MMP9    | OMIM |
| MNG1    | OMIM |
| MNS     | OMIM |
| MODY8   | OMIM |
| MOPD2   | OMIM |
| MOWS    | OMIM |
| MPD4    | OMIM |
| MPO     | OMIM |
| MPS9    | OMIM |
| MRD18   | OMIM |
| MRD24   | OMIM |
| MRGPRD  | OMIM |
| MRGPRE  | OMIM |
| MRGPRF  | OMIM |
| MRGPRG  | OMIM |
| MRGPRX1 | OMIM |
| MRGPRX2 | OMIM |
| MRGPRX3 | OMIM |
| MRGPRX4 | OMIM |
| MRMV1   | OMIM |
| MRMV2   | OMIM |
| MTCYB   | OMIM |
| MTDPS1  | OMIM |
| MTDPS12 | OMIM |
| MTDPS4A | OMIM |
| MTDPS4B | OMIM |
| MTDPS6  | OMIM |
| MTTK    | OMIM |
| MVCD1   | OMIM |
| MVP     | OMIM |
| MWS     | OMIM |
| MYH7    | OMIM |
| MYOT    | OMIM |
| NAV2    | OMIM |
| NF1     | OMIM |

|        |      |
|--------|------|
| NF2    | OMIM |
| NFKB1  | OMIM |
| NGF    | OMIM |
| NLRP12 | OMIM |
| NLSDM  | OMIM |
| NPS    | OMIM |
| NPY    | OMIM |
| NPY1R  | OMIM |
| NR0B1  | OMIM |
| NS1    | OMIM |
| NS4    | OMIM |
| NTRK1  | OMIM |
| OD     | OMIM |
| OFD1   | OMIM |
| OI13   | OMIM |
| OMPP   | OMIM |
| OPA1   | OMIM |
| OPLAHD | OMIM |
| OPRD1  | OMIM |
| OPRK1  | OMIM |
| OPRM1  | OMIM |
| OPTA1  | OMIM |
| OPTA2  | OMIM |
| OPTB6  | OMIM |
| OS1    | OMIM |
| OS3    | OMIM |
| OSCS   | OMIM |
| OSMED  | OMIM |
| P2RX3  | OMIM |
| P2RX4  | OMIM |
| P2RX5  | OMIM |
| PAN    | OMIM |
| PARK6  | OMIM |
| PCLD   | OMIM |
| PCTT   | OMIM |
| PDB    | OMIM |
| PENK   | OMIM |
| PEOA3  | OMIM |
| PEOA4  | OMIM |
| PEPS   | OMIM |
| PFKM   | OMIM |
| PGAM2  | OMIM |
| PGL1   | OMIM |
| PGL4   | OMIM |
| PHOAR1 | OMIM |
| PJS    | OMIM |
| PKD1   | OMIM |
| PKD2   | OMIM |
| PKHD1  | OMIM |
| PLOD3  | OMIM |
| PLOSL  | OMIM |

|         |      |
|---------|------|
| PMC     | OMIM |
| PMPCB   | OMIM |
| PNH1    | OMIM |
| PNH2    | OMIM |
| PNMHH   | OMIM |
| PNOC    | OMIM |
| PNPLA6  | OMIM |
| POMK    | OMIM |
| PPAC    | OMIM |
| PPKNEFD | OMIM |
| PPOX    | OMIM |
| PRKCE   | OMIM |
| PRKCZ   | OMIM |
| PRLHR   | OMIM |
| PROK2   | OMIM |
| PROL1   | OMIM |
| PRX     | OMIM |
| PSACH   | OMIM |
| PTGER1  | OMIM |
| PTGER2  | OMIM |
| PTGES   | OMIM |
| PTGIR   | OMIM |
| PTGS1   | OMIM |
| PTGS2   | OMIM |
| PWS     | OMIM |
| PYGM    | OMIM |
| RAD54L  | OMIM |
| RCDP1   | OMIM |
| RHUC1   | OMIM |
| RLN2    | OMIM |
| RMD     | OMIM |
| RMD1    | OMIM |
| ROR2    | OMIM |
| RRS     | OMIM |
| RTPS2   | OMIM |
| RVCL    | OMIM |
| SCAR4   | OMIM |
| SCDO5   | OMIM |
| SCN1    | OMIM |
| SCN10A  | OMIM |
| SCN11A  | OMIM |
| SCN1B   | OMIM |
| SCN2A   | OMIM |
| SCN4A   | OMIM |
| SCN9A   | OMIM |
| SDHB    | OMIM |
| SHANK3  | OMIM |
| SIM2    | OMIM |
| SLC12A3 | OMIM |
| SLC16A1 | OMIM |
| SLC17A6 | OMIM |

|           |      |
|-----------|------|
| SLC17A8   | OMIM |
| SLC34A2   | OMIM |
| SMA3      | OMIM |
| SMARCB1   | OMIM |
| SMA3      | OMIM |
| SMDP2     | OMIM |
| SMN1      | OMIM |
| SMPD1     | OMIM |
| SMS       | OMIM |
| SOS1      | OMIM |
| SOST      | OMIM |
| SOX9      | OMIM |
| SPDA1     | OMIM |
| SPG3A     | OMIM |
| SPG4      | OMIM |
| SPG7      | OMIM |
| SPG8      | OMIM |
| SPINK1    | OMIM |
| SPS       | OMIM |
| SPTLC1    | OMIM |
| SRXX2     | OMIM |
| SSX1      | OMIM |
| STL1      | OMIM |
| STL3      | OMIM |
| STOML3    | OMIM |
| STRMK     | OMIM |
| TAC1      | OMIM |
| TACR1     | OMIM |
| TDH3      | OMIM |
| TGD       | OMIM |
| TH        | OMIM |
| THPH3     | OMIM |
| TIMM8A    | OMIM |
| TLR4      | OMIM |
| TNFRSF11B | OMIM |
| TNFRSF1A  | OMIM |
| TNNC1     | OMIM |
| TNXB      | OMIM |
| TREH      | OMIM |
| TRPA1     | OMIM |
| TRPC1     | OMIM |
| TRPM2     | OMIM |
| TRPM5     | OMIM |
| TRPM8     | OMIM |
| TRPS1     | OMIM |
| TRPV2     | OMIM |
| TRPV4     | OMIM |
| TTR       | OMIM |
| TYRSN1    | OMIM |
| UFS1      | OMIM |
| UROD      | OMIM |

|        |      |
|--------|------|
| VANGL1 | OMIM |
| VDDR2A | OMIM |
| VHL    | OMIM |
| VSCM   | OMIM |
| VUR4   | OMIM |
| WNK1   | OMIM |
| WVS    | OMIM |
| XMPMA  | OMIM |
| YARS2  | OMIM |



**Table S2 List of dysregulated genes in spinal nerve ligation mice compared to sham treatment mice**

| <b>Upregulated genes</b> | <b>Downregulated genes</b> |
|--------------------------|----------------------------|
| 1700007G11Rik            | 0610010F05Rik              |
| 1700021K19Rik            | 1700007K09Rik              |
| 2210015D19Rik            | 2810408B13Rik              |
| 2210018M11Rik            | 2900041M22Rik              |
| 2610034M16Rik            | 3010026O09Rik              |
| 2700038G22Rik            | 4833405L11Rik              |
| 2810002D19Rik            | 4833417J20Rik              |
| 2810408M09Rik            | 4930404N11Rik              |
| 2810410P21Rik            | 4930452B06Rik              |
| 2900026A02Rik            | 6330566A10Rik              |
| 3110043O21Rik            | 8430419K02Rik              |
| 4930506C21Rik            | 9430065F17Rik              |
| 4933413G19Rik            | A130012F09                 |
| 4933416I08Rik            | A930006K02Rik              |
| 4933427D14Rik            | Abca3                      |
| 5031425E22Rik            | Acaca                      |
| 8430419L09Rik            | Adam15                     |
| 9330102E08Rik            | Add2                       |
| 9430012M22Rik            | Agap1                      |
| 9530080O11Rik            | Agpat6                     |
| 9530083O12Rik            | Ahnak                      |
| A230072E10Rik            | Aifm3                      |
| A830019P07Rik            | Akap13                     |
| Abhd1                    | Alkbh8                     |
| Abhd13                   | Angptl4                    |
| Abhd14a                  | Ankrd24                    |
| Abr                      | Apc                        |
| Acot5                    | Arhgef10l                  |
| Actn2                    | Aspg                       |
| Adat1                    | Atad2b                     |
| Adcy1                    | Bst1                       |
| Adra2a                   | Btbd7                      |
| Aif1l                    | Btg2                       |
| Aldh1l2                  | C2                         |
| Ank1                     | C530005A16Rik              |
| Ankrd23                  | Cachd1                     |
| Ap5m1                    | Ccdc15                     |
| Aprt                     | Ccdc176                    |
| Arc                      | Ccdc82                     |
| Asb1                     | Ccl11                      |
| Asb16                    | Cd2ap                      |
| Asna1                    | Cd86                       |
| Atat1                    | Cdc42bpg                   |
| Atp5b                    | Cdcp1                      |
| AU021092                 | Chd7                       |
| B4galt3                  | Chl1                       |
| Bckdhb                   | Cirbp                      |
| Bfsp2                    | Cox16                      |
| Bfsp2                    | Cpeb2                      |
| Bmp3                     | Creb3l1                    |
| Bpgm                     | Crybb3                     |
| Braf                     | Csde1                      |
| Bsg                      | Csn3                       |
| Btbd9                    | Csnk1a1                    |
| Bysl                     | Cxcl1                      |
| C1qtnf3                  | Cyp26a1                    |
| Calr                     | D030074K08Rik              |
| Camk2d                   | D19Ert409e                 |
| Ccdc65                   | Daam1                      |
| Ccdc88c                  | Dach2                      |
| Ccnl2                    | Dbt                        |
| Cdc42ep1                 | Dcn                        |
| Cdh4                     | Ddx3y                      |
| Cdh5                     | Dhfr                       |
| Cenpl                    | Dync1h1                    |
| Cep41                    | E330021D16Rik              |
| Chid1                    | Eea1                       |
| Chp1                     | Egfr                       |
| Chrna4                   | Eif3a                      |
| Clstn2                   | Eml2                       |
| Cnot8                    | Epb4.1                     |
| Col26a1                  | Erbb2ip                    |
| Commd7                   | Exoc1                      |

|               |              |
|---------------|--------------|
| Crkl          | Exosc5       |
| Csnk1g1       | Fam114a2     |
| Ctnnd1        | Fam208a      |
| Cyp27a1       | Fam71e1      |
| D19Bwg1357e   | Filip1       |
| D930031A20Rik | Fkbp15       |
| Dalrd3        | Flot1        |
| Dcaf17        | Fnbp1l       |
| Dcdc2a        | Fndc3a       |
| Ddo           | Fopnl        |
| Dennd2c       | Foxd1        |
| Dennd5a       | Gdf15        |
| Dhx15         | Gfra1        |
| Dmap1         | Gjb6         |
| Dmc1          | Gldc         |
| Dnah6         | Gm13152      |
| Dnaja4        | Gm4285       |
| Dnajc27       | Gm5665       |
| Dok5          | Gm8179       |
| Dpp7          | Gpbp1l1      |
| Dram1         | Gpr133       |
| Dusp11        | Gprc5d       |
| Dusp18        | Gstt2        |
| Dusp19        | Gsx1         |
| Dusp23        | Gtf2h5       |
| Dvl3          | H2-BI        |
| E030003E18Rik | H2-BI        |
| Ears2         | Hcn1         |
| Ecm2          | Heatr5b      |
| Eif2a         | Herc6        |
| Elmod1        | Hgf          |
| Elmod1        | Hjrp         |
| Endov         | Hnrnpa1      |
| Ep400         | Hoxb8        |
| Epm2a         | Hspg2        |
| Exosc3        | Ifih1        |
| Fads6         | Il1r1        |
| Faim2         | Il4ra        |
| Fam101b       | Itfg2        |
| Fam126b       | Izumo4       |
| Fam181a       | Izumo4       |
| Fam185a       | Kcnj4        |
| Fam206a       | Kdm4c        |
| Fntb          | Kif22        |
| Folr1         | Klc1         |
| Fstl4         | Klhl15       |
| Fut4          | Klhl7        |
| Gal3st4       | Lair1        |
| Galnt6        | Lgals4       |
| Gas7          | Lmtk2        |
| Gen1          | LOC102632383 |
| Gja5          | LOC102635301 |
| Gjb1          | LOC102640779 |
| Gjc2          | LOC102642631 |
| Glis2         | LOC664628    |
| Glo1          | Lrrtm4       |
| Glp1r         | Lsamp        |
| Glrb          | Ltc4s        |
| Gm10404       | Lum          |
| Gm4651        | Lyve1        |
| Gm5577        | Map1b        |
| Gm9946        | Map2         |
| Gng7          | Matn4        |
| Golgb1        | Mctp2        |
| Gpd1          | Mettl7a1     |
| Gpr137        | Mettl7a2     |
| Gpr137        | Mob1b        |
| Gpr37l1       | Mpdu1        |
| Grm4          | Msln         |
| Gskip         | Mszf81       |
| Gtf2i         | Mtor         |
| Gtpbp1        | Mtrr         |
| H2-M10.6      | Myo9a        |
| Haao          | Ncf1         |
| Hc            | Ncmap        |



|              |           |
|--------------|-----------|
| Hebp2        | Nek1      |
| Hif1an       | Npat      |
| Hoxa3        | Nxph4     |
| Hoxb6        | Olfr1148  |
| Hoxb9        | Olfr1226  |
| Hs1bp3       | Olfr821   |
| Hs3st2       | Olfr847   |
| Hspa1a       | Omd       |
| Hspa4l       | Osgin1    |
| Hspa4l       | Ovgp1     |
| Htr1d        | Pan3      |
| Ifi203       | Pan3      |
| Ift74        | Pcdh10    |
| Ighm         | Pde1a     |
| Iglon5       | Pde1a     |
| Ikzf4        | Pde1a     |
| Il2rg        | Pde1c     |
| Imp4         | Pdpk1     |
| Itga10       | Pfas      |
| Jazf1        | Pgm2      |
| Jph2         | Pgr       |
| Kcnk5        | Pik3cb    |
| Kcns2        | Pilrb2    |
| Klc2         | Plekhg6   |
| Klhl32       | Pnlip     |
| Lamc3        | Pnpla6    |
| Lcat         | Pofut2    |
| Lcor         | Polr3b    |
| Ldb3         | Pot1a     |
| Lemd3        | Ppp1r18os |
| Lipf         | Ppt1      |
| LOC102634401 | Prex2     |
| LOC102634727 | Prrg4     |
| Lrguk        | Prune2    |
| Lrrc51       | Rac3      |
| Ltbp4        | Rad52     |
| Magee2       | Rbbp4     |
| Mapk8        | Rbm26     |
| Mbd5         | Rdh18-ps  |
| Mesdc1       | Rnd1      |
| Mettl5os     | Rprd2     |
| Mis18bp1     | Rps6kb1   |
| Mkl2         | Rspo3     |
| Mmaa         | Rufy2     |
| Mmp17        | Scgb1c1   |
| Mob3b        | Sel1l     |
| Mon1b        | Selp      |
| Mrpl3        | Sft2d1    |
| Mrrf         | Slc51b    |
| Mutyh        | Slc6a19   |
| Myb          | Simap     |
| N28178       | Smc2      |
| Ncs1         | Snx24     |
| Ndr3         | Sp4       |
| Nek11        | Spink10   |
| Nkx2-9       | Spr2g     |
| Nmrk2        | Srsf10    |
| Nrip2        | Stk3      |
| Nsun4        | Stxbp5    |
| Olfr1509     | Suv420h1  |
| Olfr229      | Syt4      |
| Olfr411      | Tdrd12    |
| Otog         | Tet2      |
| Oxct1        | Tex19.2   |
| P4ha1        | Thbs2     |
| P4ha1        | Thns12    |
| Paqr3        | Tmem44    |
| Pdgfra       | Tmod2     |
| Phc3         | Tmx1      |
| Pigt         | Tnpo2     |
| Pik3ap1      | Txnip     |
| Pik3c2b      | Usp53     |
| Pkd2l2       | Vgll1     |
| Pkd2l2       | Wdr62     |
| Plekha2      | Wnt5b     |

|          |         |
|----------|---------|
| Pmepa1   | Wrn     |
| Pnp      | Xrcc3   |
| Pogz     | Zbtb8a  |
| Ppp1r10  | Zfand5  |
| Ppp1r32  | Zfp112  |
| Ppp1r42  | Zfp119a |
| Ppp2r3d  | Zfp26   |
| Prcp     | Zfp28   |
| Prmt3    | Zfp280d |
| Proser2  | Zfp318  |
| Prr5l    | Zfp326  |
| Psmc5    | Zfp334  |
| Ptgfr    | Zfp788  |
| Ptx4     | Zfp820  |
| Pus1     |         |
| Rab38    |         |
| Rabl2    |         |
| Rad1     |         |
| Rassf2   |         |
| Rassf3   |         |
| Rassf4   |         |
| Rcvrn    |         |
| Rfng     |         |
| Rftn1    |         |
| Rgl1     |         |
| Rilpl1   |         |
| Ring1    |         |
| Rpap1    |         |
| Rprd1b   |         |
| Sap18    |         |
| Scarb2   |         |
| Scn1b    |         |
| Sct1     |         |
| Sec13    |         |
| Sfrp5    |         |
| Sft2d2   |         |
| Sgpp2    |         |
| Sgsh     |         |
| Sh3rf3   |         |
| Slc13a5  |         |
| Slc22a8  |         |
| Slc25a25 |         |
| Slc26a1  |         |
| Slc26a3  |         |
| Slc27a5  |         |
| Slc6a15  |         |
| Smim7    |         |
| Sned1    |         |
| Sox14    |         |
| Sox6     |         |
| Spata2   |         |
| Spata9   |         |
| Srpr     |         |
| Ssbp2    |         |
| St13     |         |
| Stx16    |         |
| Supt20   |         |
| Tbata    |         |
| Tceanc2  |         |
| Tcte1    |         |
| Tek      |         |
| Terf2    |         |
| Tex36    |         |
| Tgfa     |         |
| Thap2    |         |
| Thns1    |         |
| Tjp2     |         |
| Tlr3     |         |
| Tlr5     |         |
| Tmcc2    |         |
| Tmem106c |         |
| Tmem117  |         |
| Tmem129  |         |
| Tmem170  |         |
| Tmem33   |         |

|          |  |
|----------|--|
| Tmem88b  |  |
| Tnc      |  |
| Tnfrsf21 |  |
| Tnfrsf25 |  |
| Toe1     |  |
| Tomm40   |  |
| Trav3n-3 |  |
| Trim6    |  |
| Tspan9   |  |
| Ttc30a1  |  |
| Tunar    |  |
| Ubap2l   |  |
| Ube2v1   |  |
| Ucn3     |  |
| Uncx     |  |
| Vpreb3   |  |
| Vps13b   |  |
| Vps13d   |  |
| Wars     |  |
| Wdr16    |  |
| Wdr4     |  |
| Wdr83    |  |
| Wfdc2    |  |
| Wwp2     |  |
| Ybey     |  |
| Yipf1    |  |
| Ypel2    |  |
| Zdhhc5   |  |
| Zfp330   |  |
| Zfp384   |  |
| Zfp449   |  |
| Zfp712   |  |
| Zmat3    |  |

**Table S3 List of hubs and the corresponding degree values**

| <b>Node</b> | <b>Degree</b> |
|-------------|---------------|
| KNG1        | 92            |
| ADCY8       | 83            |
| ADCY1       | 83            |
| AKT1        | 83            |
| POMC        | 79            |
| BDKRB2      | 78            |
| BDKRB1      | 77            |
| TRP53       | 76            |
| GNAI2       | 70            |
| IL6         | 64            |
| VEGFA       | 59            |
| DRD2        | 58            |
| CCR5        | 57            |
| NPS         | 57            |
| NOS1        | 56            |
| CCR2        | 55            |
| DRD4        | 55            |
| EDN1        | 55            |
| CNR1        | 53            |
| SST         | 53            |
| CXCR1       | 53            |
| NPY         | 53            |
| MAPK14      | 53            |
| HTR1B       | 52            |
| HTR1A       | 52            |
| TNF         | 52            |
| EGFR        | 52            |
| HTR1F       | 51            |
| GAL         | 51            |
| DRD3        | 51            |
| OPRM1       | 51            |
| HTR1D       | 50            |
| PTGS2       | 50            |
| CHRM4       | 50            |
| CHRM2       | 50            |
| OPRK1       | 50            |
| CXCL1       | 49            |
| ADORA1      | 48            |
| GRM4        | 48            |
| CNR2        | 48            |
| HC          | 48            |
| NPY1R       | 48            |
| SSTR2       | 48            |
| GPR44       | 47            |
| NPY2R       | 47            |
| PENK        | 47            |
| FGF2        | 47            |
| SSTR5       | 47            |
| SSTR3       | 47            |

|          |    |
|----------|----|
| SSTR1    | 47 |
| GALR2    | 47 |
| OPRL1    | 47 |
| TAS2R113 | 47 |
| ADRA2C   | 47 |
| ADRA2B   | 47 |
| ADRA2A   | 47 |
| HRH4     | 47 |
| HRH3     | 47 |
| OPRD1    | 47 |
| PNOC     | 47 |
| NFKB1    | 44 |
| PPARA    | 43 |
| MMP9     | 43 |
| LEP      | 43 |
| MMP2     | 41 |
| BCL2     | 40 |
| EDNRA    | 39 |
| KRAS     | 39 |
| PIK3CB   | 38 |
| JAK2     | 38 |
| SOS1     | 38 |
| HTR2A    | 37 |
| MTOR     | 37 |
| EDNRB    | 37 |
| ICAM1    | 36 |
| HTR2C    | 35 |
| MAPK8    | 35 |
| CALCA    | 35 |
| PTPN6    | 35 |
| F2RL1    | 35 |
| HTR2B    | 34 |
| PTGER1   | 34 |
| CHRM1    | 34 |
| TACR1    | 34 |
| KDR      | 33 |
| CYSLTR1  | 33 |
| TAC1     | 33 |
| GRPR     | 32 |
| GHSR     | 32 |
| PTGFR    | 32 |
| TLR4     | 32 |
| HRH1     | 32 |
| ADRA1B   | 32 |
| GRP      | 32 |
| PROK2    | 31 |
| DRD1A    | 31 |
| AVPR1B   | 31 |
| AVPR1A   | 31 |
| NPFFR2   | 31 |
| CHRM5    | 31 |

|         |    |
|---------|----|
| CHRM3   | 31 |
| GNRHR   | 31 |
| ADRB2   | 31 |
| ADRA1D  | 31 |
| ADRA1A  | 31 |
| TACR3   | 31 |
| ESR1    | 30 |
| GNAO1   | 30 |
| PTGIR   | 30 |
| AR      | 30 |
| ADRB3   | 30 |
| ADORA2A | 30 |
| CCL2    | 29 |
| CSF2    | 29 |
| GLP1R   | 29 |
| PTGER2  | 29 |
| HTR7    | 29 |
| JAK1    | 29 |
| GNB5    | 29 |
| FSHR    | 29 |
| ABL1    | 28 |
| ADRB1   | 28 |
| ADM     | 28 |
| PTH1R   | 27 |
| HTR6    | 27 |
| LHCGR   | 27 |
| AVPR2   | 27 |
| IL1B    | 27 |
| NGF     | 27 |
| GNG7    | 27 |
| BDNF    | 27 |
| TAAR1   | 26 |
| GLP2R   | 26 |
| CALCR   | 26 |
| CALCB   | 26 |
| DRD5    | 26 |
| MC1R    | 26 |
| HRH2    | 26 |
| RHOB    | 26 |
| TLR2    | 25 |
| KIT     | 24 |
| MAPK11  | 24 |
| JAK3    | 24 |
| GRIN1   | 24 |
| CAMK2D  | 23 |
| CD44    | 22 |
| DCN     | 22 |
| RAC3    | 22 |
| CDK5    | 22 |
| NFKBIA  | 22 |
| IL10    | 22 |

|         |    |
|---------|----|
| RXRA    | 22 |
| CRKL    | 22 |
| FLT1    | 21 |
| HSPG2   | 21 |
| PGR     | 21 |
| PPARG   | 21 |
| PDGFRB  | 21 |
| ARRB2   | 20 |
| FGF1    | 20 |
| CACNA1C | 20 |
| ACTN2   | 20 |
| ACACA   | 20 |
| GRIN2B  | 20 |
| COL1A1  | 19 |
| HGF     | 19 |
| VEGFB   | 19 |
| MYB     | 19 |
| PDGFRA  | 19 |
| COL1A2  | 18 |
| NR3C1   | 18 |
| PGF     | 18 |
| ERBB4   | 18 |
| FGFR1   | 18 |
| IKBKB   | 18 |
| COL3A1  | 18 |
| NOS2    | 17 |
| TLR3    | 17 |
| APOE    | 17 |
| GRIN2A  | 17 |
| ESR2    | 16 |
| CDH5    | 16 |
| LPL     | 16 |
| IFNG    | 16 |
| TEK     | 16 |
| CYP1A2  | 15 |
| FLT4    | 15 |
| CSF1R   | 15 |
| PDPK1   | 15 |
| CSF3    | 15 |
| PRKAA1  | 15 |
| DVL3    | 15 |
| HDAC2   | 15 |
| KCNH2   | 14 |
| KCND3   | 14 |
| HSPA5   | 14 |
| FGF4    | 14 |
| FGFR2   | 14 |
| THBS2   | 14 |
| PRKAG2  | 14 |
| NTRK1   | 14 |
| PRKCE   | 14 |

|         |    |
|---------|----|
| PRKAA2  | 14 |
| CTNND1  | 14 |
| GRIN2C  | 14 |
| ITGA10  | 14 |
| NFKB2   | 13 |
| NR0B1   | 13 |
| SLC6A4  | 13 |
| CFTR    | 13 |
| MPL     | 13 |
| PTGS1   | 13 |
| CAV3    | 13 |
| A2M     | 13 |
| KCND2   | 13 |
| RAF1    | 13 |
| COL2A1  | 13 |
| PLA2G4A | 13 |
| COL11A2 | 13 |
| FN1     | 13 |
| EPHA2   | 13 |
| PRKAG3  | 13 |
| PRKAB2  | 13 |
| IL4RA   | 13 |
| SOX9    | 13 |
| COL6A1  | 13 |
| CSF2RA  | 13 |
| CSF3R   | 12 |
| OSMR    | 12 |
| KCNA1   | 12 |
| COL5A2  | 12 |
| IFNGR1  | 12 |
| PRKAB1  | 12 |
| LIFR    | 12 |
| CYP19A1 | 12 |
| COL9A3  | 11 |
| COL9A2  | 11 |
| NTF3    | 11 |
| CACNG2  | 11 |
| CACNA1B | 11 |
| B2M     | 11 |
| NF1     | 11 |
| DPYSL2  | 11 |
| IL5     | 11 |
| CSNK1D  | 11 |
| NTRK2   | 11 |
| GRIA2   | 11 |
| KCNQ1   | 11 |



**Table S4 List of dysregulated genes in Wu-tou Decoction treatment mice compared to spinal nerve ligation mice**

| <b>Upregulated genes</b> | <b>Downregulated genes</b> |
|--------------------------|----------------------------|
| 1700020I14Rik            | 1700011I03Rik              |
| 2810006K23Rik            | 1700019N19Rik              |
| 2810410P21Rik            | 1700030J22Rik              |
| 4930506C21Rik            | 1700112J16Rik              |
| 4930506M07Rik            | 2010107G23Rik              |
| 4930539J05Rik            | 2310022A10Rik              |
| 9930032E11Rik            | 2900056M20Rik              |
| A530017D24Rik            | 3110043O21Rik              |
| A630081D01Rik            | 4930404N11Rik              |
| AU040320                 | 4930452B06Rik              |
| Abcb7                    | 4930570G19Rik              |
| Ablim1                   | 6430548M08Rik              |
| Adamts1                  | 9030624J02Rik              |
| Aldh1l2                  | A430057M04Rik              |
| Aox4                     | A630001G21Rik              |
| Arhgef6                  | Abca7                      |
| Arhgef9                  | Abhd13                     |
| B130052P14Rik            | Acot10                     |
| Baz2a                    | Acot11                     |
| Bclaf1                   | Adrbk1                     |
| Bfsp2                    | Adrm1                      |
| Bsn                      | Agtrap                     |
| C030041B07Rik            | Aim1l                      |
| C130021H21Rik            | Akap1                      |
| C330007P06Rik            | Amigo1                     |
| C530025M09Rik            | Ap1g1                      |
| Cbx3                     | Arih1                      |
| Ccar1                    | Arl1                       |
| Ccdc141                  | Arl4a                      |
| Ccdc171                  | Arl5c                      |
| Ccnt1                    | Arpp19                     |
| Cdc42se2                 | Asph                       |
| Cdc6                     | Atf2                       |
| Cdh18                    | Atp13a2                    |
| Cdk5rap2                 | Atp5b                      |
| Ceacam2                  | B3galnt1                   |
| Cep162                   | Bag4                       |
| Cep250                   | Bag6                       |
| Cep85l                   | Bcr                        |
| Chordc1                  | Bid                        |
| Col11a2                  | Blcap                      |
| D10Wsu102e               | Brpf3                      |
| D8Ertd82e                | C2                         |
| Daam1                    | Cacnb2                     |
| Dach1                    | Cacng3                     |
| Dcc                      | Cbln1                      |
| Ddx23                    | Cbln2                      |
| Ddx58                    | Cckbr                      |
| Depdc1b                  | Ccnh                       |
| Dis3l2                   | Cct4                       |
| Dlgap2                   | Cdca4                      |
| Dmxl2                    | Cdh4                       |
| Dph3                     | Centpu                     |
| Dpp8                     | Chp1                       |
| Dtd2                     | Clcc1                      |
| Edil3                    | Cldn1                      |
| Eif2ak1                  | Cmtm2b                     |
| Eif2s3x                  | Cmtm4                      |
| Ep400                    | Crhbp                      |
| Erbp3                    | Crkl                       |
| Fam161a                  | Cry2                       |
| Fam172a                  | Ctif                       |
| Fat1                     | Cyb5r3                     |
| Fbxl22                   | Cytip                      |
| Fbxo25                   | Ddah1                      |
| Fbxw15                   | Dedd2                      |
| Gabra1                   | Dnajc27                    |
| Galnt6                   | Dnajc5                     |
| Gatm                     | Drd2                       |
| Gbf1                     | E330021D16Rik              |
| Gcnt1                    | Ecd                        |
| Gm15800                  | Egfl8                      |
| Gpatch2                  | Eif2ak4                    |

|              |              |
|--------------|--------------|
| Gpd1l        | Eif6         |
| Gpr82        | Elac1        |
| Grin2b       | Endov        |
| Gtpbp4       | Entpd6       |
| Hcfc1        | Ephx4        |
| Hectd2       | Ept1         |
| Hook3        | Esd          |
| Hsf2         | Fads6        |
| Huwe1        | Fam163b      |
| Ifi44        | Fam177a      |
| Impg2        | Fbxl14       |
| Inpp1        | Fgf13        |
| Ipo8         | Fgf3         |
| Kcna2        | Fgfr1        |
| Kdelc1       | Foxk1        |
| Kmt2c        | Fstl4        |
| LOC102632642 | Fxyd6        |
| Layn         | Fzd7         |
| Lrrc8b       | Gabarapl1    |
| Lzts1        | Gabra5       |
| Map1a        | Gfra4        |
| Mdn1         | Gjb6         |
| Mki67        | Glt8d2       |
| Mrps5        | Gm16039      |
| Mrv1         | Gm4862       |
| Msl1         | Gm8300       |
| Mtfr2        | Gnas         |
| Mvd          | Gpr1         |
| Myo1b        | H2-M3        |
| Nap1l3       | Hjurp        |
| Narg2        | Homer2       |
| Ncoa7        | Hoxb8        |
| Nfya         | Icam4        |
| Nog          | Idi2         |
| Nsd1         | Ip6k1        |
| Nubpl        | Ipo4         |
| Nup1         | Jade2        |
| Oas1a        | Kcnb1        |
| Oas2         | Kcnf1        |
| Osbpl1a      | Kcnh6        |
| Pcdh12       | Kcnt1        |
| Pcdhga9      | Kdelr3       |
| Pde4b        | Kif3c        |
| Pdia4        | Kif4         |
| Phf3         | Kif5c        |
| Piga         | Kpna6        |
| Polr3g       | LOC102633802 |
| Ppp1r12b     | Laptm4b      |
| Ppp2cb       | Lasp1        |
| Proca1       | Lmbr1        |
| Ptn          | Lox          |
| Ptpn22       | Lrrc3        |
| Pvt1         | Lyz1         |
| Rab8a        | Lyz2         |
| Rassf4       | Mab2111      |
| Rbm28        | Mad211       |
| Rgl1         | Magee1       |
| Rn45s        | Man2a2       |
| Rnf103       | Mb21d2       |
| Rnf4         | Mc4r         |
| Rsrc1        | Mcemp1       |
| Ryr3         | Med13l       |
| S1pr1        | Med14        |
| Sbno1        | Med22        |
| Serinc5      | Mettl20      |
| Serpinc1     | Mettl7a2     |
| Sh3tc1       | Mknk1        |
| Sla2         | Mme          |
| Slc9b2       | Mphosph8     |
| Slitrk2      | Msc          |
| Sox6         | Mtch1        |
| Spl2a        | Muc5ac       |
| Sptbn1       | Napa         |
| Stil         | Napg         |
| Stk38        | Ncald        |

|          |           |
|----------|-----------|
| Tcea3    | Ncdn      |
| Tdrd9    | Nckap1    |
| Tie1     | Ncs1      |
| Tmem161b | Ndrd4     |
| Tmem217  | Nek8      |
| Tmprss5  | Neur11a   |
| Toporsos | Neurod2   |
| Trim30a  | Npcd      |
| Trim59   | Nrl       |
| Trove2   | Nt5c3b    |
| Tspan1   | Nup43     |
| Tspyl4   | Nxph1     |
| Ube2b    | Nxph2     |
| Ube2q2   | Oip5      |
| Ubr2     | Olig2     |
| Vegfa    | Os9       |
| Vps13c   | Otud5     |
| Vstm2a   | Ovol2     |
| Wdfy3    | Pan2      |
| Zfp318   | Parl      |
| Zfp609   | Pcdh19    |
| Zfp7     | Pdpn      |
| Zufsp    | Pdxk      |
|          | Pex3      |
|          | Phf12     |
|          | Pias1     |
|          | Pias3     |
|          | Pigu      |
|          | Pin1      |
|          | Pithd1    |
|          | Pkia      |
|          | Plekhb2   |
|          | Pnlip     |
|          | Pnp       |
|          | Pon2      |
|          | Ppap2a    |
|          | Ppp2cb    |
|          | Praf2     |
|          | Prex2     |
|          | Prkar1b   |
|          | Prosc     |
|          | Prps1     |
|          | Psma3     |
|          | Ptpn3     |
|          | Pygb      |
|          | Rab11fip5 |
|          | Rab38     |
|          | Rab3c     |
|          | Raf1      |
|          | Rap1gap   |
|          | Rap1gap2  |
|          | Rassf6    |
|          | Ric3      |
|          | Rims3     |
|          | Rit2      |
|          | Rnaseh2a  |
|          | Rnf114    |
|          | Rnf181    |
|          | Rps6kl1   |
|          | Rragd     |
|          | Rxra      |
|          | Sbf2      |
|          | Sec22a    |
|          | Sec23a    |
|          | Serpina3j |
|          | Sesn1     |
|          | Sgce      |
|          | Six4      |
|          | Slc19a1   |
|          | Slc25a16  |
|          | Slc25a39  |
|          | Slc29a3   |
|          | Slc30a2   |
|          | Slc30a9   |
|          | Slc35f4   |

|  |            |
|--|------------|
|  | Smcr8      |
|  | Snn        |
|  | Sowahb     |
|  | Sphkap     |
|  | St6galnac6 |
|  | Stard4     |
|  | Stc1       |
|  | Ston1      |
|  | Stx5a      |
|  | Syng3      |
|  | Taf9       |
|  | Tax1bp1    |
|  | Tbc1d20    |
|  | Tfe3       |
|  | Tgs1       |
|  | Thrb       |
|  | Tmem128    |
|  | Tmem222    |
|  | Tmem26     |
|  | Tmub2      |
|  | Tmx2       |
|  | Tollip     |
|  | Tom1       |
|  | Tph2       |
|  | Trappc3    |
|  | Trim32     |
|  | Tro        |
|  | Trpc4ap    |
|  | Tspan3     |
|  | Tuba1c     |
|  | Tubb2a     |
|  | Tunar      |
|  | Tusc3      |
|  | Ube2q1     |
|  | Uck1       |
|  | Usp12      |
|  | Vat1l      |
|  | Vgl13      |
|  | Vps11      |
|  | Vps18      |
|  | Wars       |
|  | Wdsub1     |
|  | Wnt5b      |
|  | Wwox       |
|  | Yipf1      |
|  | Zdhc7      |
|  | Zdhc8      |
|  | Zfand2a    |

**Table S5 Topological features of 94 major nodes in the WTD-SNL-network**

| <b>Node</b> | <b>Degree</b> | <b>nCloseness</b> | <b>nBetweenness</b> | <b>Coreness</b> |
|-------------|---------------|-------------------|---------------------|-----------------|
| A2m         | 10            | 3.86483407        | 0.731335998         | 6               |
| Abl1        | 10            | 3.84734082        | 1.107792974         | 6               |
| Adcy1       | 79            | 3.88894677        | 2.948341131         | 48              |
| Adcy8       | 79            | 3.88894677        | 2.948341131         | 48              |
| Adora2a     | 30            | 3.84062433        | 0.871294379         | 28              |
| Adrb1       | 30            | 3.84101868        | 0.137759894         | 28              |
| Adrb2       | 30            | 3.84101868        | 0.137759894         | 28              |
| Adrb3       | 30            | 3.84101868        | 0.137759894         | 28              |
| Adrbk1      | 39            | 3.85527277        | 0.331420302         | 33              |
| Akt1        | 38            | 3.9597671         | 13.11651325         | 9               |
| Ar          | 11            | 3.86084437        | 0.346051633         | 8               |
| Arrb2       | 10            | 3.88007045        | 1.00346458          | 9               |
| Bcl2        | 21            | 3.90804601        | 2.387921095         | 9               |
| Bcr         | 9             | 3.84417725        | 0.251015693         | 6               |
| Bdkrb1      | 79            | 3.88127851        | 1.153547525         | 48              |
| Bdkrb2      | 79            | 3.88127851        | 1.153547525         | 48              |
| Calca       | 32            | 3.84575844        | 2.345514297         | 28              |
| Ccl2        | 13            | 3.89299464        | 1.584055543         | 9               |
| Ccr2        | 53            | 3.88611794        | 1.500628948         | 48              |
| Ccr5        | 53            | 3.88611794        | 1.500628948         | 48              |
| Chrm1       | 34            | 3.84932065        | 0.041469287         | 33              |
| Chrm3       | 34            | 3.84932065        | 0.041469287         | 33              |
| Chrm5       | 34            | 3.84932065        | 0.041469287         | 33              |
| Cxcl1       | 49            | 3.87484455        | 0.379442602         | 48              |
| Drd1a       | 30            | 3.83589745        | 0.971275926         | 28              |
| Drd2        | 51            | 3.90641332        | 2.197220802         | 48              |
| Edn1        | 37            | 3.91459084        | 4.818490982         | 33              |
| Ednrb       | 36            | 3.86683202        | 0.589920878         | 33              |
| Egfr        | 24            | 3.90600514        | 2.763232708         | 8               |
| Erb3        | 8             | 3.85328674        | 0.05739947          | 6               |
| Esr1        | 11            | 3.85487533        | 0.320744872         | 8               |
| F2rl1       | 35            | 3.90355921        | 2.203831196         | 33              |
| Fgf1        | 13            | 3.8307898         | 0.035405014         | 8               |
| Fgf2        | 27            | 3.90030241        | 2.424484491         | 8               |
| Fgf4        | 12            | 3.83039737        | 0.022334032         | 8               |
| Fgfr1       | 11            | 3.82922077        | 0.064792603         | 8               |
| Flt1        | 12            | 3.83786559        | 0.067977734         | 8               |
| Flt4        | 10            | 3.8327527         | 0.026087986         | 8               |
| Fn1         | 8             | 3.86483407        | 0.76381427          | 6               |
| Fshr        | 29            | 3.83550406        | 0.36029008          | 28              |
| Gnai2       | 57            | 3.91090655        | 5.257874489         | 48              |
| Gnao1       | 10            | 3.87604928        | 0.577082157         | 8               |
| Gnas        | 35            | 3.8477366         | 0.639530838         | 28              |
| Hc          | 49            | 3.85646534        | 0.501784921         | 48              |
| Hgf         | 8             | 3.84417725        | 0.042022102         | 8               |
| Htr1f       | 49            | 3.85646534        | 0.043088529         | 48              |
| Icam1       | 16            | 3.89461637        | 3.009595394         | 8               |
| Ikbkb       | 8             | 3.8477366         | 0.117098697         | 6               |
| Il1b        | 8             | 3.82843685        | 0.538988888         | 6               |

|        |    |            |             |    |
|--------|----|------------|-------------|----|
| Il6    | 17 | 3.88127851 | 2.95264554  | 7  |
| Jak2   | 19 | 3.88087583 | 2.322144508 | 7  |
| Jak3   | 11 | 3.84062433 | 0.645284057 | 6  |
| Kdr    | 19 | 3.91008878 | 2.054989815 | 8  |
| Kit    | 16 | 3.85885262 | 0.53436625  | 8  |
| Kng1   | 84 | 3.91787148 | 5.664847374 | 48 |
| Kras   | 21 | 3.91377139 | 1.957557797 | 8  |
| Mapk11 | 10 | 3.88854241 | 1.146100283 | 7  |
| Mapk14 | 27 | 3.93601346 | 4.988200188 | 9  |
| Mapk8  | 13 | 3.90845442 | 1.135702014 | 8  |
| Mmp2   | 17 | 3.89421082 | 1.771540165 | 9  |
| Mmp9   | 21 | 3.89908266 | 1.963966489 | 9  |
| Mtor   | 11 | 3.86523366 | 1.345139027 | 6  |
| Nfkb1  | 27 | 3.90968013 | 2.235308647 | 9  |
| Nfkbia | 11 | 3.86803174 | 0.38676247  | 6  |
| Ngf    | 12 | 3.83471751 | 0.741111994 | 6  |
| Nos1   | 20 | 3.89989567 | 3.753659964 | 9  |
| Nps    | 61 | 3.87123489 | 2.372232914 | 33 |
| Nr3c1  | 14 | 3.85130262 | 1.137782097 | 8  |
| Oprk1  | 49 | 3.8572607  | 1.496752739 | 48 |
| Oprm1  | 50 | 3.85845447 | 0.087431952 | 48 |
| Pdgfra | 11 | 3.82922077 | 0.036752708 | 8  |
| Pdgfrb | 13 | 3.84180784 | 0.154603839 | 8  |
| Pdpk1  | 8  | 3.84575844 | 0.214855254 | 6  |
| Pgf    | 12 | 3.823349   | 0.022920046 | 8  |
| Pgr    | 11 | 3.84575844 | 0.16701816  | 8  |
| Pik3cb | 24 | 3.8740418  | 1.10900104  | 8  |
| Pomc   | 75 | 3.88208437 | 1.58860445  | 48 |
| Ppara  | 21 | 3.87886333 | 2.584760666 | 8  |
| Ptger2 | 29 | 3.88531065 | 2.594103336 | 28 |
| Ptgs2  | 26 | 3.93311596 | 6.595977306 | 9  |
| Ptpn6  | 15 | 3.87524605 | 0.988463938 | 6  |
| Rac3   | 13 | 3.85090613 | 0.810037971 | 6  |
| Rhob   | 11 | 3.84259725 | 0.488927603 | 6  |
| Rxra   | 19 | 3.82686996 | 0.85462749  | 8  |
| S1pr1  | 51 | 3.91582036 | 3.470973015 | 48 |
| Sos1   | 19 | 3.84575844 | 0.778500676 | 8  |
| Sstr2  | 49 | 3.86323738 | 0.526861012 | 48 |
| Tac1   | 34 | 3.84615374 | 0.501784921 | 33 |
| Tacr1  | 34 | 3.88329363 | 0.885583758 | 33 |
| Tek    | 10 | 3.82765317 | 0.046252396 | 8  |
| Tnf    | 31 | 3.91746092 | 5.849211693 | 9  |
| Trp53  | 38 | 3.93228889 | 17.25653839 | 9  |
| Vegfa  | 29 | 3.93767118 | 4.63768959  | 9  |
| Vegfb  | 16 | 3.87805891 | 0.613156497 | 8  |
